# Supplementary material for: Effects of UV-B and Water Deficit on Aroma Precursors in Grapes and Flavor Release during Wine Micro-Vinification and Consumption
Source: MDPI journal article supplement (doi:10.3390/foods11091336), 2022-05-04
Supplement: s1 [file s1]

Supplementary Table 1 *The correlation between the concentrations of grape-derived aroma compounds and the consumption of individual amino acids*

|                      | Arg    | Glu     | Gln     | His     | Phe    | Tyr      | Trp    | Leu     | Val    | Ile    | Asp     | Thr     | Met     | Lys    | Ser     | Gly     | Asn | Ala     |
|----------------------|--------|---------|---------|---------|--------|----------|--------|---------|--------|--------|---------|---------|---------|--------|---------|---------|-----|---------|
| Acetic acid          | n.s    | .902*   | .952**  | .879*   | n.s    | n.s      | .902*  | .944**  | .948** | .911*  | n.s     | n.s     | .825*   | n.s    | .990*   | n.s     | n.s | n.s     |
| Isobutyric acid      | -.825* | n.s     | n.s     | n.s     | -.902* | -.928**  | n.s    | -.827*  | -.835* | n.s    | n.s     | -.932** | n.s     | n.s    | -.927*  | n.s     | n.s | -.956** |
| Butanoic acid        | n.s    | n.s     | n.s     | n.s     | n.s    | n.s      | n.s    | n.s     | n.s    | n.s    | n.s     | n.s     | n.s     | -.887* | n.s     | -.943** | n.s | n.s     |
| Isovaleric acid      | n.s    | -.911*  | .840*   | n.s     | n.s    | .814*    | .860*  | n.s     | n.s    | n.s    | n.s     | n.s     | n.s     | n.s    | n.s     | n.s     | n.s | n.s     |
| 2-Methybutanoic acid | -.903* | n.s     | n.s     | -.937** | n.s    | n.s      | n.s    | n.s     | n.s    | n.s    | n.s     | -.852*  | n.s     | n.s    | n.s     | n.s     | n.s | -.845*  |
| Hexanoic acid        | n.s    | .907*   | .937**  | n.s     | .911*  | .928**   | .880*  | .935**  | .861*  | .888*  | n.s     | .843*   | .936**  | n.s    | .933**  | n.s     | n.s | .865*   |
| Octanoic acid        | .816*  | n.s     | n.s     | n.s     | .953** | .945**   | n.s    | .848*   | n.s    | n.s    | n.s     | .904*   | .848*   | n.s    | .913*   | n.s     | n.s | .943**  |
| Phenylethyl alcohol  | n.s    | n.s     | n.s     | n.s     | n.s    | n.s      | n.s    | n.s     | n.s    | n.s    | n.s     | n.s     | n.s     | n.s    | n.s     | n.s     | n.s | n.s     |
| Isoamyl alcohol      | 0.867* | n.s     | n.s     | n.s     | 0.913* | 0.984**  | n.s    | n.s     | n.s    | n.s    | 0.828*  | 0.953** | n.s     | n.s    | 0.931** | n.s     | n.s | 0.962** |
| Ethyl isobutyrate    | n.s    | n.s     | n.s     | n.s     | n.s    | n.s      | n.s    | n.s     | n.s    | n.s    | 0.881*  | n.s     | n.s     | n.s    | n.s     | n.s     | n.s | n.s     |
| Ethyl butanoate      | n.s    | 0.955** | 0.941** | n.s     | 0.864* | 0.927**  | 0.906* | 0.925*  | 0.853* | 0.855* | n.s     | 0.885*  | 0.871*  | n.s    | 0.965** | n.s     | n.s | 0.880*  |
| Ethyl isovalerate    | n.s    | 0.900*  | 0.857*  | n.s     | n.s    | 0.898*   | 0.877* | 0.826*  | n.s    | n.s    | 0.873*  | 0.880*  | n.s     | n.s    | 0.935*  | n.s     | n.s | 0.855*  |
| Isoamyl acetate      | 0.837* | 0.898*  | 0.881*  | 0.817*  | 0.899* | 0.942**  | n.s    | 0.904*  | 0.846* | n.s    | 0.835*  | 0.968** | 0.823*  | n.s    | 0.994** | n.s     | n.s | 0.957** |
| Ethyl pentanoate     | n.s    | n.s     | n.s     | n.s     | n.s    | n.s      | n.s    | n.s     | n.s    | n.s    | n.s     | n.s     | n.s     | n.s    | n.s     | n.s     | n.s | n.s     |
| Ethyl hexanoate      | n.s    | n.s     | 0.897*  | n.s     | 0.886* | 0.941**  | 0.875* | 0.905*  | 0.880* | 0.841* | n.s     | 0.887*  | 0.864*  | n.s    | 0.952** | n.s     | n.s | 0.904*  |
| Ethyl heptanoate     | n.s    | n.s     | n.s     | n.s     | n.s    | n.s      | n.s    | n.s     | n.s    | n.s    | n.s     | n.s     | n.s     | n.s    | n.s     | n.s     | n.s | n.s     |
| Ethyl octanoate      | n.s    | n.s     | 0.862*  | n.s     | 0.907* | 0.855*   | n.s    | 0.880*  | n.s    | 0.857* | n.s     | n.s     | 0.953** | n.s    | 0.822** | n.s     | n.s | n.s     |
| Ethyl decanoate      | n.s    | 0.854*  | 0.886*  | n.s     | 0.880* | 0.850*   | 0.800* | 0.879*  | n.s    | 0.868* | n.s     | n.s     | 0.954** | n.s    | 0.815*  | n.s     | n.s | n.s     |
| Ethyl acetate        | n.s    | 0.941** | 0.926** | n.s     | 0.896* | 0.931**  | 0.859* | 0.933** | 0.863* | 0.828* | n.s     | 0.933** | 0.867*  | n.s    | 0.988*  | n.s     | n.s | 0.924** |
| Phenylethyl alcohol  | n.s    | 0.969** | 0.911*  | n.s     | n.s    | n.s      | n.s    | 0.884*  | n.s    | 0.833* | n.s     | n.s     | 0.844*  | n.s    | 0.822*  | n.s     | n.s | n.s     |
| Linalool             | n.s    | n.s     | n.s     | n.s     | n.s    | -0.927** | n.s    | n.s     | n.s    | n.s    | -0.875* | -0.876* | n.s     | n.s    | n.s     | n.s     | n.s | -0.882* |

|                        |     |         |         |     |        |     |        |        |        |        |     |     |        |        |        |     |     |
|------------------------|-----|---------|---------|-----|--------|-----|--------|--------|--------|--------|-----|-----|--------|--------|--------|-----|-----|
| Citronellol            | n.s | 0.848*  | n.s     | n.s | n.s    | n.s | n.s    | n.s    | n.s    | n.s    | n.s | n.s | n.s    | n.s    | n.s    | n.s | n.s |
| 2-Phenylethyl acetate  | n.s | 0.969** | 0.911*  | n.s | n.s    | n.s | n.s    | 0.884* | n.s    | 0.833* | n.s | n.s | 0.844* | n.s    | 0.822* | n.s | n.s |
| $\beta$ -Damascenone   | n.s | 0.989** | 0.952** | n.s | 0.816* | n.s | 0.849* | 0.932* | 0.814* | 0.878* | n.s | n.s | 0.900* | n.s    | 0.884* | n.s | n.s |
| Geraniol               | n.s | n.s     | n.s     | n.s | n.s    | n.s | n.s    | n.s    | n.s    | n.s    | n.s | n.s | n.s    | 0.881* | n.s    | n.s | n.s |
| Ethyl hydroxycinnamate | n.s | n.s     | n.s     | n.s | n.s    | n.s | n.s    | n.s    | n.s    | n.s    | n.s | n.s | n.s    | n.s    | n.s    | n.s | n.s |
| $\alpha$ -Ionone       | n.s | n.s     | n.s     | n.s | n.s    | n.s | n.s    | n.s    | n.s    | n.s    | n.s | n.s | n.s    | n.s    | n.s    | n.s | n.s |
| Ethyl cinnamate        | n.s | n.s     | n.s     | n.s | n.s    | n.s | n.s    | n.s    | n.s    | n.s    | n.s | n.s | n.s    | n.s    | n.s    | n.s | n.s |

\* Correlation is significant at the 0.05 level (2-tailed).

\*\* Correlation is significant at the 0.01 level (2-tailed)
